# Supplementary material
Source: MDPI journal article supplement (https://www.mdpi.com/2073-4441/16/4/622)
Supplement: s1 [file s1]

**Supplementary material:**

**Figure S1:** Na-K-Mg ternary diagram of geothermal waters in the Beijing area. All geothermal waters plot in the immature water field or partially equilibrated or mixed water.

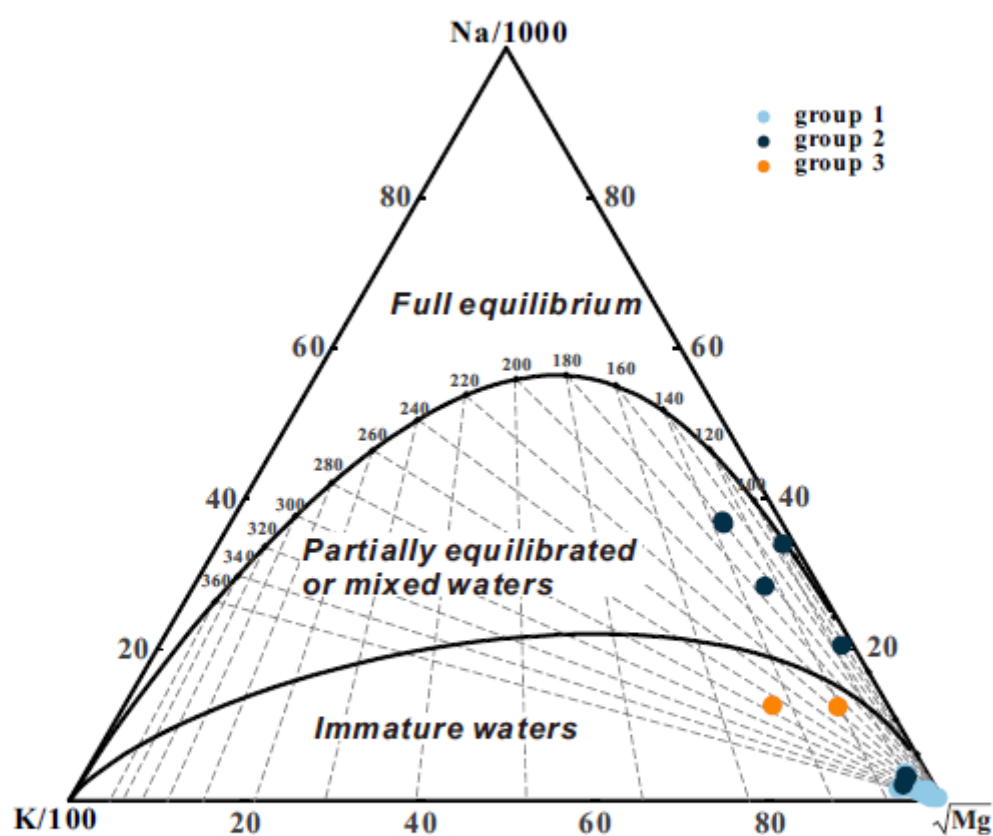

Fig. S1

**Figure S2:** Relationship between the volume of recharge water ( $10^4\text{m}^3$ ) and the number of earthquakes ( $>M_L=1$ ) in the Beijing area. The positive correlation between recharge water and earthquake frequency indicates that the injection of geothermal recharge water is the cause of earthquakes in the Beijing area. Earthquake data from the China Earthquake Administration. Geothermal recharge data from Beijing Hydrogeological Engineering Team.

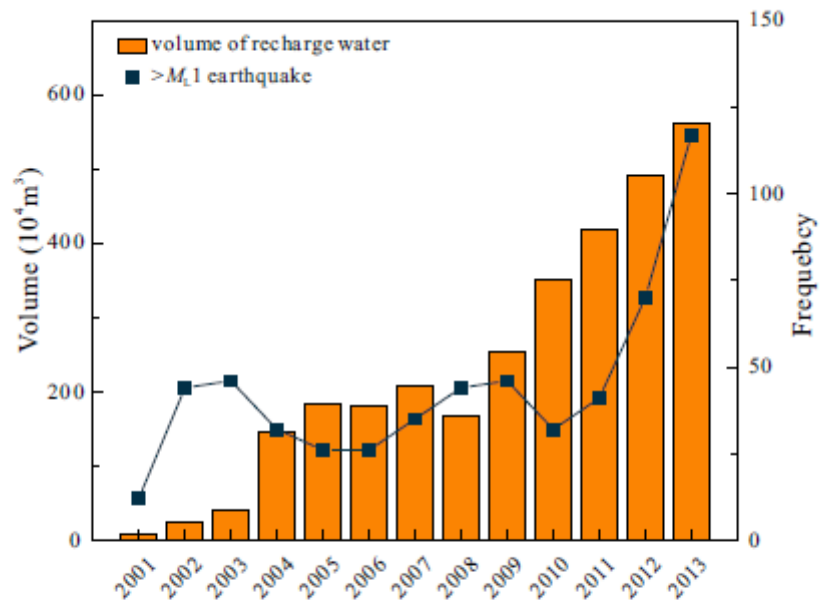

Fig. S2

**Table S1:** Physical properties, hydrogeochemistry and isotopic compositions of geothermal waters from Beijing area.

| group | No. | Type       | TDS  | pH   | T    | Depth | Li <sup>+</sup> | Na <sup>+</sup> | K <sup>+</sup> | Mg <sup>2+</sup> | Ca <sup>2+</sup> | Cl <sup>-</sup> | SO <sub>4</sub> <sup>2-</sup> | CO <sub>3</sub> <sup>2-</sup> | HCO <sub>3</sub> <sup>-</sup> | SiO <sub>2</sub> | Rb     | Sr     | Ni     | δD    | δ <sup>18</sup> O |
|-------|-----|------------|------|------|------|-------|-----------------|-----------------|----------------|------------------|------------------|-----------------|-------------------------------|-------------------------------|-------------------------------|------------------|--------|--------|--------|-------|-------------------|
|       |     |            |      |      | (°C) | (m)   | (mg/L)          | (mg/L)          | (mg/L)         | (mg/L)           | (mg/L)           | (mg/L)          | (mg/L)                        | (mg/L)                        | (mg/L)                        | (mg/L)           | (μg/L) | (μg/L) | (μg/L) | (‰)   | (‰)               |
| 1     | 4   | Well       | -    | -    | 64   | 3000  | 0.10            | 18.20           | 5.54           | 18.90            | 47.70            | 9.52            | 28.60                         | -                             | 219.00                        | 49.00            | 7.25   | 319    | 2.81   | -81.8 | -11.7             |
| 1     | 5   | Well       | -    | 9.10 | 40   | 2500  | 0.15            | 67.60           | 11.80          | 22.50            | 53.30            | 29.20           | 120.00                        | -                             | 244.00                        | -                | 13.00  | 1413   | 3.90   | -75.6 | -10.2             |
| 1     | 6   | Well       | 346  | 7.50 | 68   | 2500  | 0.17            | 76.10           | 13.00          | 15.00            | 39.10            | 24.20           | 67.00                         | -                             | 262.00                        | 55.80            | 19.30  | 854    | 2.85   | -72   | -10.1             |
| 1     | 7   | Hot spring | -    | -    | 55   | -     | 0.13            | 73.40           | 11.50          | 16.70            | 36.80            | 14.70           | 59.50                         | -                             | 272.00                        | -                | 14.90  | 617    | 2.73   | -73.4 | -10.4             |
| 1     | 8   | Hot spring | 562  | 7.50 | 55   | -     | 0.16            | 64.30           | 9.84           | 12.40            | 40.30            | 13.70           | 82.00                         | -                             | 211.00                        | -                | 13.00  | 896    | 2.74   | -79.2 | -12               |
| 1     | 9   | Well       | -    | -    | 64   | 2500  | 0.14            | 30.00           | 6.61           | 13.10            | 39.60            | 9.22            | 46.10                         | -                             | 198.00                        | -                | 13.10  | 390    | 2.06   | -78.1 | -10.8             |
| 1     | 10  | Well       | 401  | 7.00 | 66   | 2980  | 0.14            | 59.30           | 10.70          | 20.30            | 57.50            | 28.60           | 119.00                        | -                             | 229.00                        | 49.00            | 16.10  | 2007   | 2.86   | -72.1 | -9.6              |
| 1     | 12  | Well       | 346  | 7.40 | 40   | 3300  | 0.03            | 66.40           | 6.03           | 27.40            | 40.20            | 13.70           | 142.00                        | -                             | 215.00                        | -                | 7.60   | 2778   | 1.91   | -77.7 | -10.9             |
| 1     | 14  | Well       | 301  | 7.20 | 69   | 2700  | 0.19            | 55.30           | 12.30          | 10.20            | 46.10            | 17.10           | 71.40                         | -                             | 207.00                        | 59.50            | 25.80  | 882    | 1.92   | -78.3 | -9.9              |
| 1     | 15  | Well       | -    | -    | 76   | 3790  | 0.18            | 58.80           | 9.50           | 9.41             | 43.60            | 25.80           | 86.80                         | -                             | 170.00                        | -                | 22.10  | 829    | 1.77   | -77.9 | -10.6             |
| 1     | 16  | Well       | 440  | 7.50 | 48   | 1800  | 0.34            | 135.00          | 9.96           | 13.20            | 19.20            | 62.50           | 53.40                         | -                             | 276.00                        | 35.50            | 14.80  | 604    | 1.03   | -76.8 | -11.1             |
| 1     | 21  | Well       | 720  | 7.60 | 33   | 2207  | 0.27            | 31.90           | 8.51           | 34.10            | 34.00            | 4.01            | 46.00                         | -                             | 292.00                        | -                | 12.30  | 528    | 3.97   | -72.8 | -10.6             |
| 1     | 22  | Hot spring | -    | -    | 30   | -     | 0.26            | 12.20           | 1.86           | 21.00            | 40.50            | 5.36            | 23.90                         | -                             | 219.00                        | -                | 2.53   | 246    | 2.23   | -69.3 | -9.8              |
| 1     | 23  | Well       | -    | -    | 34   | 3000  | 0.36            | 69.60           | 21.20          | 20.50            | 28.30            | 50.40           | 67.60                         | -                             | 207.00                        | -                | 12.30  | 249    | 2.15   | -78.1 | -10.8             |
| 1     | 25  | Hot spring | -    | -    | 44   | -     | 0.00            | 137.00          | 10.10          | 13.70            | 19.20            | 64.80           | 60.40                         | -                             | 276.00                        | -                | 14.90  | 596    | 1.08   | -75.8 | -11.2             |
| 1     | 26  | Hot spring | -    | -    | 13   | -     | 1.05            | 5.41            | 1.56           | 2.32             | 29.20            | 2.84            | 9.90                          | -                             | 87.70                         | -                | 7.72   | 2620   | 1.96   | -69.2 | -9.6              |
| 2     | 1   | Well       | 1191 | 9.20 | 44   | 200   | 0.20            | 147.00          | 2.68           | 0.05             | 7.57             | 46.30           | 177.00                        | 20.30                         | 17.70                         | -                | 24.80  | 447    | 0.51   | -90.6 | -12.5             |
| 2     | 2   | Well       | -    | -    | 58   | 2000  | 0.21            | 145.00          | 2.70           | 0.05             | 7.48             | 46.30           | 173.00                        | 19.80                         | 20.60                         | -                | 26.00  | 448    | 0.83   | -92.4 | -12.6             |
| 2     | 3   | Well       | 968  | 8.20 | 35   | 533   | 0.09            | 106.00          | 9.51           | 11.40            | 37.80            | 22.10           | 77.70                         | -                             | 303.00                        | -                | 12.00  | 811    | 3.61   | -89.3 | -12.4             |
| 2     | 13  | Hot spring | -    | -    | 65   | -     | 0.17            | 84.50           | 14.50          | 14.80            | 46.90            | 51.50           | 48.70                         | -                             | 281.00                        | -                | 37.20  | 814    | 1.91   | -84.3 | -11.3             |
| 2     | 18  | Well       | -    | 9.03 | 42   | 800   | 0.09            | 132.00          | 0.83           | 0.25             | 3.16             | 21.20           | 29.70                         | 51.60                         | 170.00                        | 32.50            | -      | -      | -      | -     | -                 |
| 2     | 19  | Well       | -    | 7.92 | 38   | 1200  | 0.03            | 105.00          | 0.43           | 0.04             | 5.27             | 17.40           | 134.00                        | -                             | 79.30                         | 31.80            | -      | -      | -      | -     | -                 |
| 2     | 20  | Well       | 386  | 6.90 | 55   | 2800  | 0.02            | 114.00          | 9.34           | 11.00            | 32.30            | 32.10           | 77.30                         | -                             | 303.00                        | -                | 17.30  | 1007   | 2.16   | -91.7 | -12.6             |
| 2     | 24  | Hot spring | -    | -    | 40   | -     | 0.03            | 151.00          | 3.32           | 0.12             | 8.52             | 43.70           | 189.00                        | 20.90                         | 15.20                         | -                | 27.00  | -      | 0.90   | -90.3 | -12.2             |
| 3     | 11  | Well       | -    | -    | 60   | 2200  | 0.66            | 434.00          | 20.10          | 8.12             | 22.20            | 325.00          | 5.53                          | -                             | 648.00                        | -                | 36.90  | 581    | 0.53   | -79.6 | -10.2             |
| 3     | 17  | Well       | 1740 | 8.00 | 92   | 3588  | 1.58            | 494.00          | 52.00          | 8.52             | 23.60            | 225.00          | 1.05                          | -                             | 1022.00                       | 82.20            | 110.00 | -      | 1.42   | -     | -                 |

Note: “-” represents below detection limit or undetected.

**Table S2:** Temperature results obtained with empirical chemical geothermometers (values in °C) and depths (m) of origin for the Beijing area geothermal waters.

| Group | No. | T(°C) | Li     | Na     | SiO <sub>2</sub> | Na       | Li       | Geothermometers |                  |     |    | Circulation depth(m) | Note   |
|-------|-----|-------|--------|--------|------------------|----------|----------|-----------------|------------------|-----|----|----------------------|--------|
|       |     |       | (mg/L) | (mg/L) | (mg/L)           | (mmol/L) | (mmol/L) | Na-Li           | SiO <sub>2</sub> |     |    |                      |        |
|       |     |       |        |        |                  |          |          | a               | b                | c   | d  |                      |        |
| 1     | 4   | 64    | 0.10   | 18.20  | 49.00            | 0.79     | 0.01     | 194             | 101              | 109 | 71 | 5265                 |        |
| 1     | 5   | 40    | 0.15   | 67.60  |                  | 2.94     | 0.02     | 124             |                  |     |    | 3291                 |        |
| 1     | 6   | 68    | 0.17   | 76.10  | 55.80            | 3.31     | 0.02     | 122             | 107              | 115 | 77 | 3207                 |        |
| 1     | 7   | 55    | 0.13   | 73.40  |                  | 3.19     | 0.02     | 105             |                  |     |    | 2748                 |        |
| 1     | 8   | 55    | 0.16   | 64.30  |                  | 2.80     | 0.02     | 130             |                  |     |    | 3455                 |        |
| 1     | 9   | 64    | 0.14   | 30.00  |                  | 1.30     | 0.02     | 181             |                  |     |    | 4915                 |        |
| 1     | 10  | 66    | 0.14   | 59.30  | 49.00            | 2.58     | 0.02     | 126             | 101              | 109 | 71 | 3333                 |        |
| 1     | 12  | 40    | 0.03   | 66.40  |                  | 2.89     | 0.00     | 38              |                  |     |    | 826                  | Delete |
| 1     | 14  | 69    | 0.19   | 55.30  | 59.50            | 2.40     | 0.03     | 153             | 110              | 117 | 81 | 4111                 |        |
| 1     | 15  | 76    | 0.18   | 58.80  |                  | 2.56     | 0.03     | 144             |                  |     |    | 3841                 |        |
| 1     | 16  | 48    | 0.34   | 135.0  | 35.50            | 5.87     | 0.05     | 132             | 86               | 96  | 56 | 3510                 |        |
| 1     | 21  | 33    | 0.27   | 31.90  |                  | 1.39     | 0.04     | 240             |                  |     |    | 6597                 |        |
| 1     | 22  | 30    | 0.26   | 12.20  |                  | 0.53     | 0.04     | 373             |                  |     |    | 10398                | Delete |
| 1     | 23  | 34    | 0.36   | 69.60  |                  | 3.03     | 0.05     | 189             |                  |     |    | 5136                 |        |
| 1     | 25  | 44    | 0.00   | 137.0  |                  | 5.96     | 0.00     | -               |                  |     |    | -                    |        |
| 1     | 26  | 13    | 1.05   | 5.41   |                  | 0.24     | 0.15     | 1436            |                  |     |    | 40753                | Delete |
| 2     | 1   | 44    | 0.20   | 147.0  |                  | 6.39     | 0.03     | 92              |                  |     |    | 2363                 |        |
| 2     | 2   | 58    | 0.21   | 145.0  |                  | 6.30     | 0.03     | 96              |                  |     |    | 2467                 |        |
| 2     | 3   | 35    | 0.09   | 106.0  |                  | 4.61     | 0.01     | 65              |                  |     |    | 1592                 |        |
| 2     | 13  | 65    | 0.17   | 84.50  |                  | 3.67     | 0.02     | 115             |                  |     |    | 3019                 |        |
| 2     | 18  | 42    | 0.09   | 132.0  | 32.50            | 5.74     | 0.01     | 57              | 83               | 93  | 52 | 2393                 |        |
| 2     | 19  | 38    | 0.03   | 105.0  | 31.80            | 4.57     | 0.00     | 20              | 82               | 92  | 51 | 2370                 |        |
| 2     | 20  | 55    | 0.02   | 114.0  |                  | 4.96     | 0.00     | 7               |                  |     |    | -70                  | Delete |
| 2     | 24  | 40    | 0.03   | 151.0  |                  | 6.57     | 0.00     | 5               |                  |     |    | -119                 | Delete |
| 3     | 11  | 60    | 0.66   | 434.0  |                  | 18.87    | 0.09     | 99              |                  |     |    | 2555                 |        |
| 3     | 17  | 92    | 1.58   | 494.0  | 82.20            | 21.48    | 0.23     | 149             | 127              | 132 | 99 | 3994                 |        |

Note: The temperature of No. 26 water is 13 °C (Table 1), which is close to the temperature of the stratosphere in the Beijing area (13.5-14 °C) (Wang et al., 2017). However, the temperature estimated by the Na-Li geothermometer is 1436 °C, which has obvious errors and should be discarded. Similarly, the No. 22 water geothermometer should also be discarded.

a Na-Li,  $T = 1000 / [\log(\text{Na}/\text{Li}) + 0.389] - 273.15$  (Fouillac and Michard, 1981)

b Quartz, no steam loss,  $T = 1309 / [5.19 - \log(\text{SiO}_2)] - 273.15$  (Fournier, 1977)

c Quartz, maximum steam loss,  $T = 1522 / [5.75 - \log(\text{SiO}_2)] - 273.15$  (Fournier, 1977)

d Chalcedony,  $T = 1032 / [4.78 - \log(\text{SiO}_2)] - 273.15$  (Fournier, 1977)

The annual average temperature in Beijing is 10 °C, the geothermal gradient is ~3.50 °C/100 m (Wang et al., 2017), and the thickness of the constant temperature zone is 20 m.

**Table S3:** Geothermal gases chemistry compositions of Xiji geothermal well (No.17) from the Beijing area.

| Date       | He (ppm) | H <sub>2</sub> (ppm) | CO <sub>2</sub> (%) | CH <sub>4</sub> (%) | N <sub>2</sub> (%) | O <sub>2</sub> (%) | References         |
|------------|----------|----------------------|---------------------|---------------------|--------------------|--------------------|--------------------|
| 2022/1/19  | 5993     | 330                  | 2.60                | 27.06               | 69.18              | 0.04               | Yang et al. (2022) |
| 2022/4/10  | 6049     | 7                    | 3.12                | 29.08               | 67.19              | 0                  |                    |
| 2022/7/12  | 6047     | 7                    | 3.84                | 27.74               | 67.81              | 0                  |                    |
| 2022/12/20 | 6050     | 6                    | 3.76                | 25.00               | 68.10              | 0                  | This study         |
| 2023/2/3   | 5238     | 17426                | 1.60                | 31.40               | 66.28              | 0                  |                    |
| 2023/4/24  | 4243     | 208                  | 0                   | 35.00               | 64.50              | 0                  |                    |

**Table S4:** Earthquake records on February 12, 2023, in the Beijing area. Data from:  
<https://news.ceic.ac.cn>.

| year | month | day | hour | minute | second | Latitude(N) | Longitude(E) | deep(km) | magnitude( $M_L$ ) |
|------|-------|-----|------|--------|--------|-------------|--------------|----------|--------------------|
| 2023 | 2     | 12  | 16   | 42     | 23     | 39.77       | 115.63       | 14       | 3.4                |
| 2023 | 2     | 12  | 16   | 43     | 18     | 39.77       | 115.63       | 5        | 1.4                |
| 2023 | 2     | 12  | 16   | 43     | 38     | 39.77       | 115.63       | 5        | 2.4                |
| 2023 | 2     | 12  | 16   | 46     | 0      | 39.77       | 115.62       | 12       | 0.7                |
| 2023 | 2     | 12  | 17   | 8      | 7      | 39.75       | 115.62       | 10       | 1.6                |
| 2023 | 2     | 12  | 17   | 27     | 0      | 39.77       | 115.63       | 13       | 1.7                |
| 2023 | 2     | 12  | 17   | 49     | 4      | 39.77       | 115.62       | 10       | 0.3                |
| 2023 | 2     | 12  | 18   | 12     | 25     | 39.75       | 115.60       | 1        | 0.1                |
| 2023 | 2     | 12  | 18   | 31     | 6      | 39.77       | 115.63       | 11       | 1.8                |
| 2023 | 2     | 12  | 20   | 46     | 27     | 39.77       | 115.63       | 11       | 1.1                |
| 2023 | 2     | 12  | 20   | 51     | 34     | 39.75       | 115.62       | 7        | 0.3                |

## References

51. Fouillac, C., and G. Michard (1981), Sodium/lithium ratio in water applied to geothermometry of geothermal reservoirs, *Geothermics*, 10(1), 55-70, doi:[https://doi.org/10.1016/0375-6505\(81\)90025-0](https://doi.org/10.1016/0375-6505(81)90025-0).
52. Fournier, R. O. (1977), Chemical geothermometers and mixing models for geothermal systems, *Geothermics*, 5(1), 41-50, doi:[https://doi.org/10.1016/0375-6505\(77\)90007-4](https://doi.org/10.1016/0375-6505(77)90007-4).
42. Wang, G., W. Zhang, W. Lin, F. Liu, X. Zhu, Y. Liu, and J. Li (2017), Research on formation mode and development potential of geothermal resources in Beijing-Tianjin-Hebei region, *Geology in China*, 44(6), 1074-1085 (in Chinese with English abstract), doi:10.12029/gc20170603.
40. Yang, M. B., et al. (2022), Geochemical characteristics of geothermal and hot spring gases in Beijing and Zhangjiakou Bohai fault zone, *Frontiers in Earth Science*, 10, doi:10.3389/feart.2022.933066.
